# Supplementary material for: Glycosylation enables aesculin to activate Nrf2
Source: PubMed Central journal article supplement (PMC4945939; doi:10.1038/srep29956), 2016-07-15
Supplement: srep29956-s1.pdf [file srep29956-s1.pdf]

## **Supplementary information**

### **Glycosylation enables aesculin to activate Nrf2**

Kyun Ha Kim<sup>1</sup>, Hyunsu Park<sup>2</sup>, Hee Jin Park<sup>2</sup>, Kyoung-Hwa Choi<sup>2</sup>, Ruxana T. Sadikot<sup>3</sup>,  
Jaeho Cha<sup>2,\*</sup>, and Myungsoo Joo<sup>1,\*</sup>

<sup>1</sup>School of Korean Medicine, Pusan National University, Yangsan 626-870, Korea

<sup>2</sup>Department of Microbiology, Pusan National University, Busan 609-735, Korea

<sup>3</sup>Section of Pulmonary and Critical Care Medicine, Atlanta Veterans Affairs Medical Center,  
Emory University, Decatur, GA30033, U.S.A.

\*E-mail address: [mjoo@pusan.ac.kr](mailto:mjoo@pusan.ac.kr)

Contents

Supplementary figures 1-3

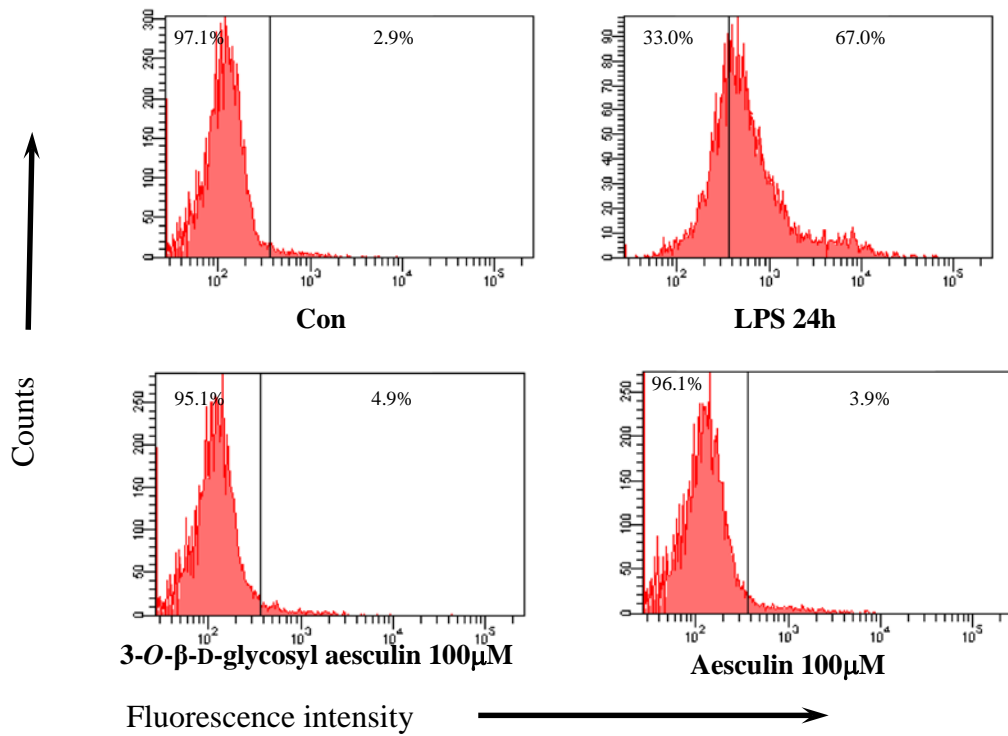

**Supplementary figure S1.**

**Intracellular ROS production by 3-O- $\beta$ -D-glycosyl aesculin and aesculin.**

RAW 264.7 cells were treated with 100  $\mu$ M of 3-O- $\beta$ -D-glycosyl aesculin or aesculin for 16h, and intracellular ROS in the RAW 264.7 cells were analyzed by FACS. As a positive control for ROS, RAW 264.7 cells were similarly treated with LPS (1 $\mu$ g/ml). The percentage of cells producing intracellular ROS is shown on the right panel.

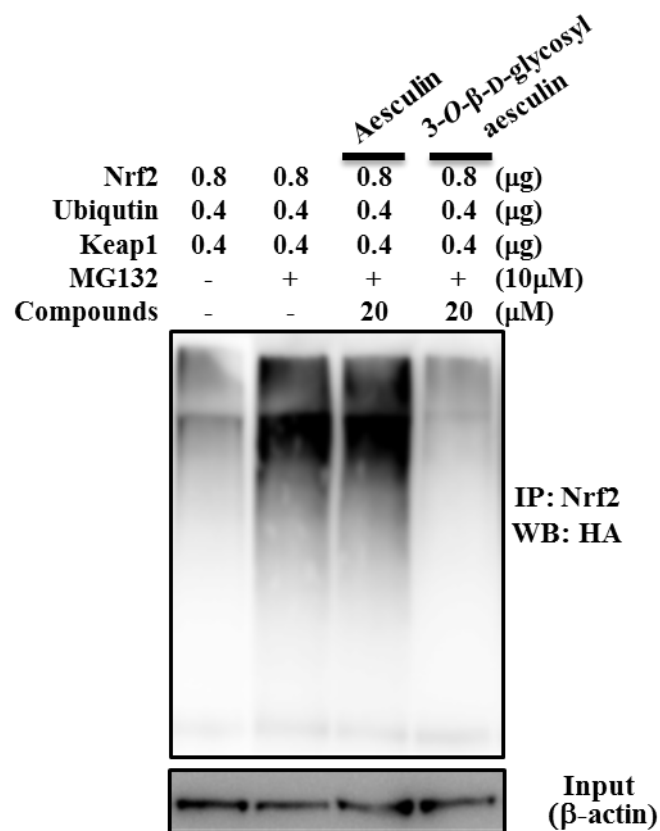

**Supplementary figure S2.**

**3-O-β-D-glycosyl aesculin, but not aesculin, blocks ubiquitination of Nrf2.**

HEK 293 cells, transfected with plasmids encoding Nrf2, HA-ubiquitin, and Keap1, were treated with aesculin or 3-O-β-D-glycosyl aesculin. Immunoprecipitation of Nrf2 and subsequent western blotting for HA (ubiquitin) were performed to reveal the ubiquitinated Nrf2.

**A.**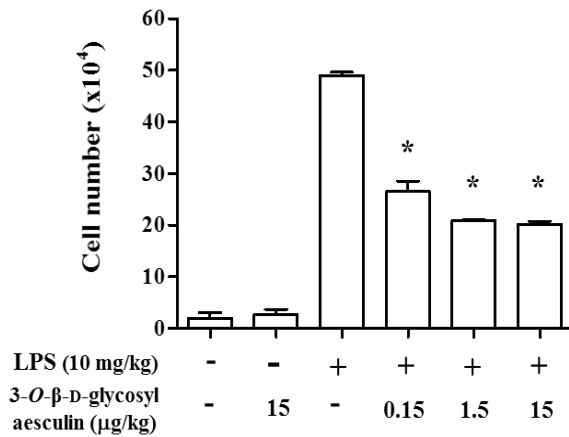**B.**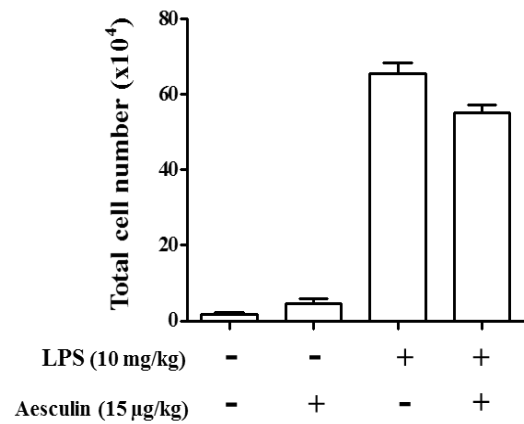**Supplementary figure S3.****3-O-β-D-glycosyl aesculin, but not aesculin, suppresses lung inflammation in ALI mice.**

(A) C57BL/6 mice (n = 5 per group) received an i.p. LPS (3<sup>rd</sup> to 6<sup>th</sup> lanes) and 2 h later 0.15 µg/kg, 1.5 µg/kg, or 15 µg/kg of i.t. 3-O-β-D-glycosyl aesculin, respectively (4<sup>th</sup> to 6<sup>th</sup> lanes). BAL was performed for counting total cells infiltrated to mouse lungs. (B) In similar experiments, mice (n = 5 per group) received an i.p. LPS (3<sup>rd</sup> and 4<sup>th</sup> lanes) and 2 h later 15 µg/kg of i.t. aesculin (2<sup>nd</sup> and 4<sup>th</sup> lanes). BAL was performed for counting total cells infiltrated to mouse lungs. Data represent the mean ± SEM of three independent counting. \*P was < 0.05, compared with mice treated with LPS only.
